# 1 Substrate dynamics contribute to enzymatic specificity in human and 2 bacterial methionine adenosyltransferases

3  
4 Madhuri Gade<sup>1</sup>, Li Lynn Tan<sup>2</sup>, Adam M. Damry<sup>2</sup>, Mahakaran Sandhu<sup>2</sup>, Josphe S. Brock<sup>3</sup>, Andie  
5 Delaney<sup>2</sup>, Alejandro Villar-Briones<sup>1</sup>, Colin J. Jackson<sup>\*2,4,5</sup>, Paola Laurino<sup>\*1</sup>

6  
7 <sup>1</sup>Protein Engineering and Evolution Unit, Okinawa Institute of Science and Technology Graduate  
8 University, 1919-1 Tancha, Onna, Okinawa, Japan 904-0495

9 <sup>2</sup>Research School of Chemistry, Australian National University, Canberra, 2601, Australia

10 <sup>3</sup>Research School of Biology, Australian National University, Canberra, 2601, Australia

11 <sup>4</sup>Australian Research Council Centre of Excellence for Innovations in Peptide and Protein  
12 Science, Research School of Chemistry, Australian National University, Canberra, 2601, ACT,  
13 Australia

14 <sup>5</sup>Australian Research Council Centre of Excellence in Synthetic Biology, Research School of  
15 Chemistry, Australian National University, Canberra, 2601, ACT, Australia

16

17

## 18 **Abstract**

19 Protein conformational change can facilitate the binding of non-cognate substrates and underlie  
20 promiscuous activities. However, the contribution of substrate conformational dynamics to this  
21 process is comparatively poorly understood. Here we analyse human (hMAT2A) and  
22 *Escherichia coli* (eMAT) methionine adenosyltransferases that have identical active sites but  
23 different substrate specificity. In the promiscuous hMAT2A, non-cognate substrates bind in a  
24 stable conformation to allow catalysis. In contrast, non-cognate substrates rarely sample stable  
25 productive binding modes in eMAT owing to altered mobility in the enzyme active site.  
26 Different cellular concentrations of substrate likely drove the evolutionary divergence of  
27 substrate specificity in these orthologs. The observation of catalytic promiscuity in hMAT2A led  
28 to the detection of a new human metabolite, methyl thioguanosine, that is produced at elevated  
29 level in a cancer cell line. This work establishes that identical active sites can result in different  
30 substrate specificity owing to the effects of substrate and enzyme dynamics.

31

32

33

## 1 **Introduction**

2 Enzymes can exhibit promiscuous activities with non-cognate substrates that are not involved in  
3 the main physiological function of the enzyme<sup>1</sup>. These promiscuous activities are often vestigial  
4 traits of a distant ancestor<sup>2</sup> or have originated by chance through evolution<sup>3-6</sup>. The importance of  
5 promiscuous enzymatic activities is becoming increasingly evident, as they have been shown to  
6 contribute to evolvability<sup>7</sup>, stress responses<sup>8</sup> and, potentially, susceptibility to disease<sup>8-10</sup>. Protein  
7 conformational sampling has been shown to play a role in substrate promiscuity<sup>11-14</sup>, as  
8 conformational change can allow enzyme to occasionally sample alternative conformations with  
9 different charge preorganization, allowing different transition states to be stabilized<sup>15</sup>. While the  
10 role of protein structural dynamics in this process has been described, the role of substrate  
11 conformational sampling is comparatively poorly understood. It has recently been reported that  
12 large active sites can accommodate multiple different productive substrate conformations  
13 without changing the conformation of the catalytic pocket<sup>16, 17</sup>, and that in some cases new  
14 Michaelis complexes can be recognized<sup>18</sup>.

15  
16 The methionine adenosyltransferases (MATs), are found in all kingdoms of life and the product  
17 of their reaction, S-adenosyl-L-methionine (SAM), is a necessary metabolite in several essential  
18 cellular processes<sup>19-21</sup>. Because of the physiological importance of SAM, dysfunction in the  
19 production of SAM by MATs can lead to disease<sup>22,23</sup>. Mechanistically, the enzyme-catalysed  
20 formation of S-adenosyl-L-methionine (SAM) from adenosine triphosphate (ATP) and  
21 methionine occurs in two steps<sup>24</sup>: first, SAM is formed by S<sub>N</sub>2 attack by the sulfur of methionine  
22 at the C5' carbon of ATP, followed by hydrolysis of triphosphate (PPPi) into pyrophosphate  
23 (PPi) and orthophosphate (Pi)<sup>25</sup> (Figure 1a). This second step is believed to provide the energy  
24 required for the conformational rearrangement of the enzyme necessary for product release<sup>26</sup>.  
25 Two Mg<sup>2+</sup> ions are involved in coordination of the triphosphate moiety of ATP and K<sup>+</sup> is known  
26 to enhance the reaction rate by allowing the active site to adopt the optimal conformation<sup>20, 27, 28</sup>.

27  
28 MATs are an excellent model system for the study of substrate promiscuity because the chemical  
29 reactivity of the cognate physiological nucleotide substrate, ATP, is independent from the  
30 nucleobase. The C5' atom, which acts as electrophile in the MAT-catalysed reaction, belongs to  
31 the sugar moiety of the nucleotide, and is therefore distant from the nucleobase<sup>29, 30</sup>. Moreover,

1 SAM is not an intrinsically better methyl donor than the potential products from promiscuous  
2 reactions with non-cognate NTPs (S-guanosyl-L-methionine (SGM), S-cytidyl-L-methionine  
3 (SCM), or S-uridyl-L-methionine (SUM)), since the nucleobase does not influence the sulfonium  
4 reactivity. While *E. coli* MAT has been reported to display specificity for ATP *in vitro*<sup>27</sup>, the  
5 promiscuity of human MAT for GTP, CTP and UTP has not been systematically explored *in*  
6 *vitro* or *in vivo*.

7  
8 In this work, we have performed a systematic study of the substrate promiscuities of human  
9 (hMAT2A) and *E. coli* (eMAT) MATs. We show that hMAT2A, unlike eMAT, exhibits  
10 substrate promiscuity towards other non-cognate NTPs. Structural analysis reveals that eMAT  
11 specificity is a consequence of altered structural constraints on non-cognate substrates in  
12 combination with increased active site loop dynamics *vs.* hMAT2A. The increased  
13 conformational freedom of the non-cognate substrates results in eMAT sampling catalytically  
14 non-productive states at higher frequency than the native substrate, ATP, providing a molecular  
15 explanation for the observed enzyme kinetics. We demonstrate that the substrate promiscuity of  
16 hMAT2A is relevant *in vivo*, and this knowledge allowed us to identify a new metabolite, methyl  
17 thioguanosine, a breakdown product of SGM, that is produced in a human liver cancer cell line  
18 but was not produced at detectable levels in a normal liver cell line.

19  
20  
21  
22  
23  
24  
25

## 1 Results

2 **The catalytic promiscuity of MATs.** For the kinetic analysis of eMAT and hMAT2A, we  
 3 developed a sensitive and specific assay based on ultra-performance liquid chromatography  
 4 (UPLC) (see Methods). This allowed us to analyse the generation of different S-(nucleoside)-L-  
 5 methionine (SNM) analogs with confirmation of the products *via* mass spectrometry (Figure 1b;  
 6 Appendix). From these data, kinetic parameters were derived (Table 1; Supplementary Figure 1).  
 7 hMAT2A efficiently catalysed the formation of SGM, SCM and SUM, in addition to the cognate  
 8 product, SAM. No spontaneous product formation was observed without MAT (Supplementary  
 9 Figure 2a). The activity of hMAT2A with the four different nucleotides varied over a relatively  
 10 narrow range ( $k_{cat}/K_M$  values of non-cognate substrates within 42-93% of ATP; Table 1). The  
 11  $k_{cat}/K_M$  of eMAT with ATP was comparable to that of hMAT2A (Table 1), albeit with lower  $k_{cat}$   
 12 and  $K_M$  values. However, the activity of eMAT for other nucleotides differed: the  $k_{cat}/K_M$  of  
 13 eMAT was 61-fold, 8.5-fold, and 139-fold lower for GTP, CTP and UTP respectively, in  
 14 comparison to ATP (Table 1; Supplementary Figure 1). Thus, while hMAT2A is catalytically  
 15 promiscuous with various NTPs, eMAT is comparatively specific (Supplementary Figure 2b).

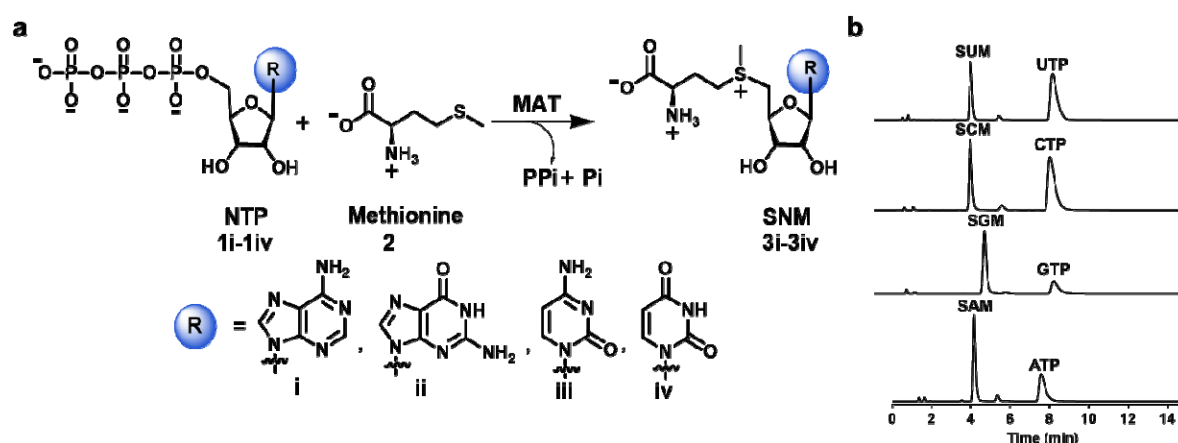

16  
 17 **Figure 1. SNM biochemical synthesis, identification of SNM analogs by UPLC.** a)  
 18 Synthesis of S-nucleoside-L-methionine (SNM) analogs S-adenosyl-L-methionine (3i, SAM), S-  
 19 guanosyl-L-methionine (3ii, SGM), S-cytidyl-L-methionine (3iii, SCM), S-uridyl-L-methionine (3iv,  
 20 SUM) from different nucleotides (ATP, GTP, CTP, UTP) and methionine. b) UPLC  
 21 chromatograms of the reaction of NTPs (5 mM) and methionine (10 mM) in presence of  
 22 hMAT2A (20  $\mu$ M) (1h, 37  $^{\circ}$ C, details are in the Methods section). Noted are the peaks  
 23 corresponding to SAM ( $t_R$  = 4.1 min), SCM ( $t_R$  = 4.6 min), SUM ( $t_R$  = 4.6 min), SGM ( $t_R$  = 5.3  
 24 min), ATP ( $t_R$  = 7.5 min), GTP ( $t_R$  = 7.8 min), CTP ( $t_R$  = 8.3 min) and UTP ( $t_R$  = 8.5 min).  
 25  
 26  
 27  
 28

1 **Table 1. Kinetic parameters\* for the SNM analog formation by hMAT2A and eMAT**

| Enzyme:Substrate | $k_{\text{cat}}$ ( $\text{s}^{-1}$ ) | $K_{\text{M}}$ (mM) | $k_{\text{cat}}/K_{\text{M}}$ ( $\text{M}^{-1}\text{s}^{-1}$ ) |
|------------------|--------------------------------------|---------------------|----------------------------------------------------------------|
| hMAT2A:ATP       | 764 ± 61                             | 0.27 ± 0.07         | $2.8 \times 10^6$                                              |
| hMAT2A:GTP       | 3270 ± 600                           | 1.26 ± 0.40         | $2.6 \times 10^6$                                              |
| hMAT2A:CTP       | 100 ± 4.8                            | 0.08 ± 0.02         | $1.3 \times 10^6$                                              |
| hMAT2A:UTP       | 1180 ± 140                           | 0.97 ± 0.2          | $1.2 \times 10^6$                                              |
| eMAT:ATP         | 66 ± 4                               | 0.06 ± 0.02         | $1.1 \times 10^6$                                              |
| eMAT:GTP         | 18 ± 2                               | 0.97 ± 0.30         | $1.8 \times 10^4$                                              |
| eMAT:CTP         | 168 ± 12                             | 1.3 ± 0.25          | $1.3 \times 10^5$                                              |
| eMAT:UTP         | 23 ± 3                               | 2.90 ± 0.7          | $7.9 \times 10^3$                                              |

2  
3 \* Kinetic parameters for the SNM analog formation by hMAT2A, eMAT using a concentration of  
4 ATP, GTP, CTP and UTP in the range of 0.025 to 5 mM and a fixed saturating concentration of  
5 methionine (10 mM) in the presence of HEPES (100 mM), KCl (50 mM),  $\text{MgCl}_2$  (10 mM), pH 8 at  
6 37 °C. [hMAT2A] was 0.5  $\mu\text{M}$  and [eMAT] concentrations were 0.5  $\mu\text{M}$  for ATP, 5  $\mu\text{M}$  for GTP,  
7 CTP and 10  $\mu\text{M}$  for UTP. SNM production was analyzed by UPLC, and data fitted to the  
8 Michaelis-Menten equation using GraphPad Prism 7.02 (Supplementary Figure 1).  
9

10 **The molecular basis for MAT specificity.** To understand the mechanisms that dictate the  
11 observed differences in catalytic specificity between hMAT2A and eMAT, we investigated three  
12 alternative explanations: (i) different oligomeric states; (ii) residue differences in the substrate  
13 binding pockets; (iii) different conformational sampling/protein dynamics, caused by sequence  
14 differences in regions remote from the active site.

15  
16 (i) *Oligomeric state.* The active sites of both enzymes are located at the dimer interface<sup>31, 32</sup>.  
17 Accordingly, we investigated whether differences between the native oligomeric states of either  
18 eMAT or hMAT2A underlie their different substrate specificity. We used the NTP analogues  
19 adenosine-5'-[( $\beta$ ,  $\gamma$ )-imido]triphosphate (AppNHp), guanosine-5'-[( $\beta$ ,  $\gamma$ )-imido]triphosphate  
20 (GppNHp), cytidine-5'-[( $\beta$ ,  $\gamma$ )-methylene] triphosphate (CppCp), and uridine-5'-[( $\beta$ ,  $\gamma$ )-  
21 imido]triphosphate (UppNHp)], since the MATs can catalyze the transferase step of the reaction  
22 to yield SNM analogues, but triphosphate hydrolysis cannot proceed and the product-bound state  
23 is thus trapped in the catalytic binding pocket (at least for the timescale of these experiments)<sup>33</sup>.  
24

1 In mammalian cells, hMAT2A exists as heterotetramer constituted by an hMAT2A homodimer,  
2 which forms the catalytic unit, and two regulatory subunits hMAT2 $\beta$ <sup>34</sup>. Since the enzyme  
3 catalytic pocket is at the hMAT2A homodimer interface and the regulatory subunits are not  
4 required for catalysis<sup>35</sup>, we here focus our study on the hMAT2A homodimer. We confirmed  
5 using size exclusion chromatography that native apo-hMAT2A exists in equilibrium between  
6 monomeric (63%) and dimeric (37%) states (Figure 2a), whereas native apo-eMAT is tetrameric  
7 (Figure 2b). The oligomeric equilibrium of hMAT2A shifts almost entirely towards the dimeric  
8 state upon incubation with the NTP analogues and methionine (Figure 2a). If any of a  
9 nonhydrolyzable NTP, methionine, triphosphate or SAM were added alone (i.e., if the ternary  
10 Michaelis complex is unable to form), no change in the oligomeric state was observed  
11 (Supplementary Figure 3a). This result suggests that formation of the ternary Michaelis complex  
12 (enzyme:NTP:Met) drives dimer formation in the case of hMAT2A. In the case of eMAT, no  
13 change in oligomeric state was observed (Figure 2b and Supplementary Figure 3b). Because  
14 there were no observed differences between the cognate and non-cognate analogs with either  
15 enzyme, it can be concluded that the differences in substrate specificity are independent of the  
16 oligomeric state of the enzymes.

17

1

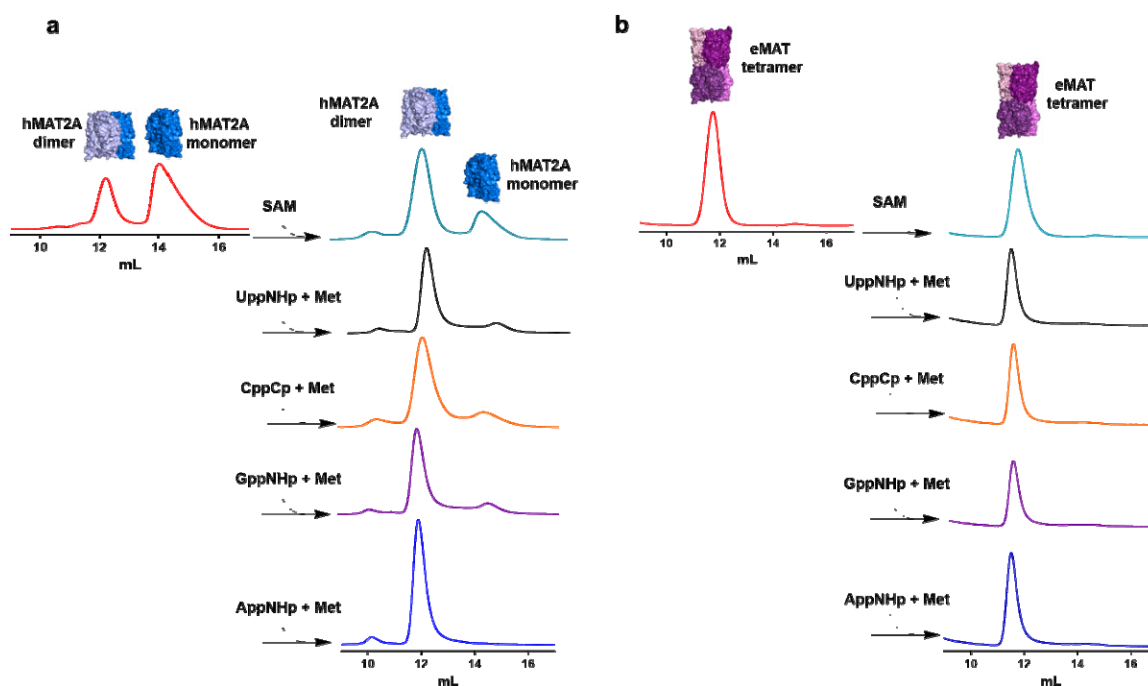

2

3 **Figure 2. Analysis of oligomeric state of hMAT2A and eMAT by size exclusion**  
4 **chromatography. a)** hMAT2A (20  $\mu$ M) is incubated with nonhydrolyzable NTPs (1 mM)  
5 adenosine-5'-[ $(\beta, \gamma)$ -imido]triphosphate (AppNHp), guanosine-5'-[ $(\beta, \gamma)$ -imido]triphosphate  
6 (GppNHp), cytidine-5'-[ $(\beta, \gamma)$ -methylene] triphosphate (CppCp), uridine-5'-[ $(\beta, \gamma)$ -  
7 imido]triphosphate (UppNHp)] together with methionine (Met, 10 mM) using reaction buffer (100  
8 mM HEPES, 10 mM KCl, 10 mM  $MgCl_2$  C for 1 hr). hMAT2A is in an equilibrium of a  
9 monomer and dimer. When incubated with both substrates convert completely in dimeric state.  
10 No change in oligomeric state when incubated with SAM. **b)** eMAT (20  $\mu$ M) is incubated using  
11 the same condition as used for hMAT2A. eMAT is in a tetrameric state and no change in  
12 oligomeric state after incubating with both substrates and SAM was observed. Size exclusion  
13 chromatography was performed using GE Healthcare Life Sciences using Superdex 200  
14 Increase 10/300 GL column.

15

16 *(ii) The substrate binding site.* To investigate the structural basis for substrate promiscuity, we  
17 then solved structures of eMAT and hMAT2A in complex with various substrates and substrate  
18 analogues (Supplementary Table 1). The structure of hMAT2A in complex with SAM and  
19 imidotriphosphate (PPNP) has previously been reported<sup>32</sup> (Figure 3a). Here we solved a crystal  
20 structure of eMAT in the presence of ATP and methionine, which enabled us to capture the SAM  
21 product-bound state of eMAT at a resolution of 1.95  $\text{\AA}$  (Figure 3b). This allowed us to align the  
22 eMAT:SAM structure to the previously published hMAT2A:SAM structure (Figure 3c). The  
23 active site structures of eMAT and hMAT2A were essentially identical; the only difference was  
24 that the eMAT structure has pyrophosphate (PPi) and orthophosphate (Pi) bound in the lower

1 part of the active site, whereas the hMAT2A structure has PPNP bound in the same position (the  
2 substrate in the hMAT2A protein crystal being the analogue AppNHp, rather than ATP).  
3 Regarding the nucleoside binding region, we observe stabilizing interactions between the  
4 enzyme and adenine ring that include a  $\pi$ -stacking interaction (3.5 Å) with Phe230/250  
5 (eMAT/hMAT2A numbering) and hydrogen bonds between the amine group of the adenine ring  
6 and the carbonyl oxygen of Arg229/249 and the N1 adenine nitrogen with the side chain of  
7 Thr227/Ser247. Closure of the active site loop brings Ile102/117 close to the adenine ring,  
8 forming van der Waals contacts.

9  
10 The alignment of the residues within the active site is strikingly similar, both in terms of identity  
11 (20/21) and structure (RMSD 0.5 Å). Indeed, every amino acid side chain adopts the same  
12 rotamer and the product is bound in an identical conformation. The only difference between the  
13 two structures is a conserved substitution at position 227/247 (Thr in eMAT vs. Ser in hMAT2A;  
14 Supplementary Figure 4). To investigate the effect of this substitution, we made Ser247Thr and  
15 Thr227Ser mutants in hMAT2A and eMAT, respectively. Neither mutation resulted in any  
16 significant change in substrate specificity in either enzyme (Supplementary Figures 5). Thus, the  
17 amino acid composition and structures of the substrate binding sites of the two enzymes do not  
18 explain the observed differences in their substrate specificity.

19



1

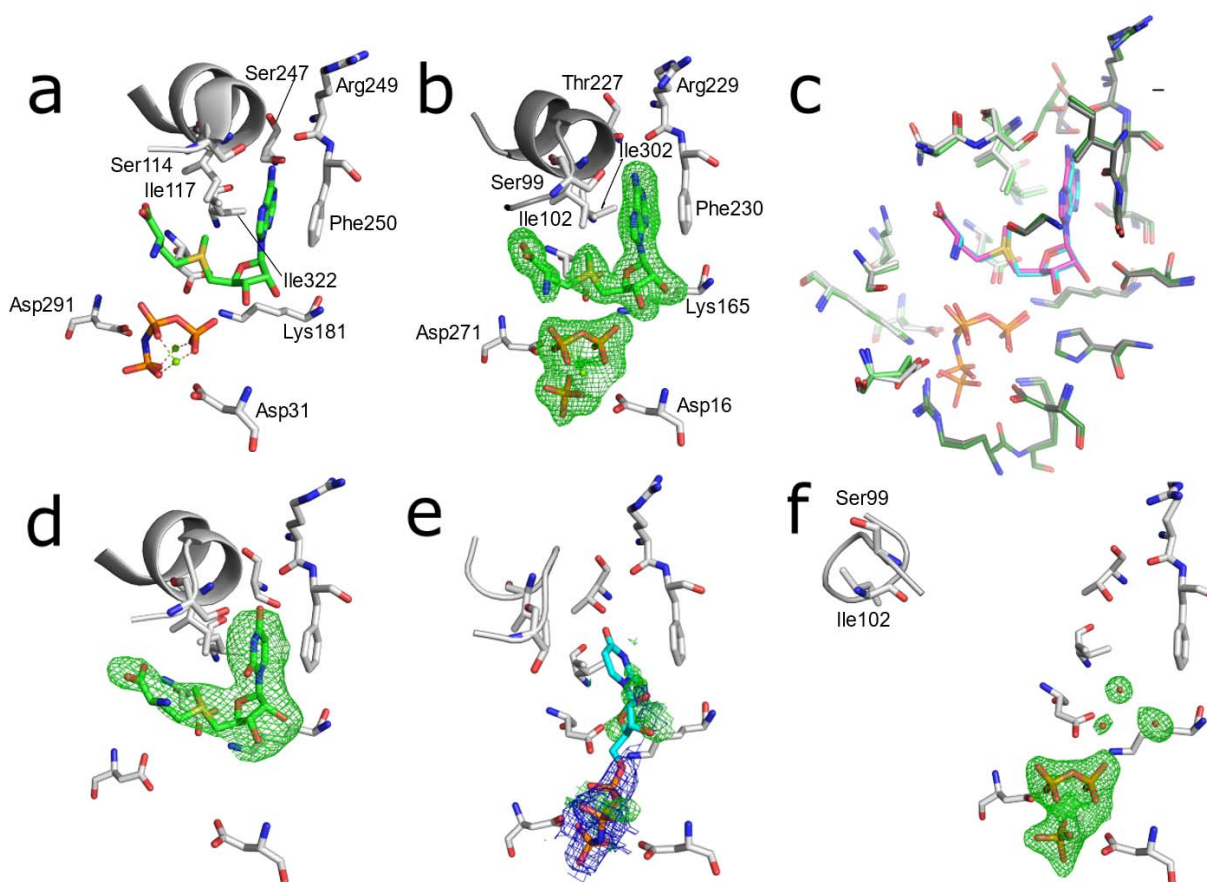

2

3 **Figure 3. The substrate binding sites of eMAT and hMAT2A with bound substrates.** Omit  
4 electron density ( $mF_o - DF_c$ ) is shown in green mesh ( $3.0 \sigma$ ),  $2mF_o - DF_c$  density is shown as blue mesh  
5 ( $1.5\sigma$ ). (a) The published structure of hMAT2A bound to the products SAM and PPNP (PDB ID  
6 4NDN). (b) Structure of eMAT obtained via cocrystallization with ATP and methionine. (c) A  
7 superimposition of the substrate binding sites of eMAT (green, cyan SAM, PPI and Pi) and hMAT2A  
8 (grey, magenta SAM, PPNP). The binding site is comprised of two chains within a homodimer; these  
9 are distinguished by light/dark colouring. (d) hMAT2A in complex with SUM after cocrystallization  
10 with UppNHp. (e) eMAT cocrystallized with UppNHp ( $2.24 \text{ \AA}$ ); the PPNP group is included in the  
11 model and shown with  $2mF_o - DF_c$ , ambiguous omit density potentially corresponding to disordered  
12 substrate/product is shown. A poorly fitting model of UppNHp is shown in stick representation (cyan).  
13 (f) eMAT bound to the products PPI and Pi ( $1.89 \text{ \AA}$ ), with the active site loop captured in the “wide-  
14 open” conformation obtained *via* cocrystallization with CTP and methionine.

15

16 To better understand the structural basis for catalytic promiscuity in hMAT2A, we co-  
17 crystallized the enzyme with the non-cognate substrate UTP analog, UppNHP, and solved the

1 structure to 2.5 Å resolution. Imido-NTP analogs have been used as partial inhibitors of MAT  
2 because, while they are still substrates for the first methionine transfer step and form the various  
3 SNM products, the imido-linkage between the  $\beta$ - $\gamma$  phosphate units prevents hydrolysis of the  
4 triphosphate moiety<sup>33</sup>. Triphosphate hydrolysis is thought to provide energy for active site loop  
5 (residues 113-131 in hMAT2A, 98-108 in eMAT) opening and product release<sup>28,32</sup>. The structure  
6 revealed the product SUM bound at high occupancy within the active site (Figure 3d) and was  
7 mostly identical to the structure of hMAT2A in complex with SAM. One difference that is not  
8 relevant to the nucleoside/SNM binding region is the observation that the PPNP group is  
9 completely absent in the structure. The active site loop was fully closed and interacted with SUM  
10 in the same manner as with SAM, and the  $\pi$ -stacking interaction with Phe250 was present. The  
11 main difference was that the hydrogen bond between the amine group of the adenine and the  
12 carbonyl oxygen of Arg249 is not present, although a hydrogen bond between the carbonyl  
13 group of the uridine ring and Ser247 is observed. The close similarity between the  
14 hMAT2A:SAM and hMAT2A:SUM complexes is consistent with the similar rates of the UTP  
15 and ATP turnover observed in the enzyme kinetics (Table 1), suggesting both substrates are  
16 stable in catalytically competed configurations.

17  
18 In contrast to the eMAT:ATP, hMAT2A:ATP and hMAT2A:UppNHp structures, when eMAT  
19 was co-crystallized with non-cognate NTPs (CTP/UTP/GTP) we did not observe electron density  
20 for any SNM product. Within the active site of the 1.89 Å resolution CTP co-crystal, clear  
21 difference density for the PPI and Pi products was observed (Figure 3), although there is  
22 unambiguously no electron density for the SCM product. Ordered water molecules were  
23 observable, suggesting the SCM had fully diffused from the active site. The active site loop,  
24 which was stable and closed in the SAM structure, was instead observed in a “wide-open”  
25 conformation, which we believe is the first time this fully open conformation has been fully  
26 modelled. For the co-crystals of eMAT with UTP (2.25 Å) and GTP (2.39 Å), which crystallized  
27 in a different space group to CTP (Supplementary Table 1), we again observe PPI and Pi in good  
28 electron density (Supplementary Figure 6). Like the CTP co-crystal, we do not observe density  
29 for the products of the methionine transferase reaction. In these crystals the density in this region  
30 appears to correspond to a phosphate molecule, which has presumably re-bound to the protein  
31 after hydrolysis. In these UTP/GTP co-crystals, the active site loop is neither closed, as in the

1 eMAT:SAM structure, nor wide-open, as in the eMAT:CTP co-crystal. Instead, it adopts a  
2 disordered intermediate conformation. These results suggest that the non-adenine containing  
3 SNM products are less stable within the active site of eMAT than SAM, consistent with eMAT  
4 being selective for ATP.

5  
6 Finally, the co-crystals of eMAT with UppNHp (2.24 Å) and GppNHp (2.50 Å) displayed clear  
7 electron density for the PPNP group and weaker electron density in the nucleoside binding  
8 region. This density is not consistent with re-bound phosphate, as observed in the GTP/UTP co-  
9 crystals (Supplementary Figure 6), both because of the non-tetrahedral shape of the density and  
10 the observation that there is no way that free phosphate could be present in these crystals, since  
11 the substrate analog cannot undergo hydrolysis between the  $\beta$ - $\gamma$  phosphodiester bond, as for the  
12 NTPs. The density also extended continuously from the PPNP moiety (Supplementary Figure 6).  
13 Finally, the active site loop was in a partially open, disordered, conformation. The poor electron  
14 density for the nucleoside groups in these structures could be due to either (or a combination of)  
15 disordered binding of the nucleoside moiety of the substrate or diffusion/disorder of the  
16 SUM/SGM product. Even if the weaker density is fully due to substrate turnover and diffusion of  
17 SUM/SGM, this behavior is very different to the eMAT:ATP and hMAT2A:UppNHp structures,  
18 in which the product was clearly stable within the active site. Thus, in contrast to hMAT2A,  
19 which interacts in an essentially identical manner with ATP and the non-cognate substrates,  
20 eMAT appears to be selective for adenine-containing substrates, because the adenine containing  
21 nucleoside moiety is more stable within the active site, which is again consistent with the  
22 enzyme kinetics (Table 1).

23  
24 *(iii) Differences in protein and substrate dynamics.* The crystallographic analysis of the  
25 UppNHp/GppNHp:eMAT complexes suggested the poor density could be due, at least in part, to  
26 a disordered substrate binding mode. To examine this possibility in more detail, we performed  
27 molecular dynamics (MD) simulations of the eMAT tetramer and hMAT2A homodimer, each in  
28 complex with both ATP and UTP to investigate whether there were significant differences  
29 between enzyme:substrate interactions across proteins that could explain their differing substrate  
30 specificities. The methionine substrate was not considered in the simulations. In order not to bias  
31 these simulations, all four simulations began with a starting model in which the loop was fully

1 closed over the active site, i.e., the eMAT:UTP bound structure was modelled on the stable SUM  
2 bound structure observed in hMAT2A to position the uridine moiety. However, during triplicate  
3 1  $\mu$ s MD simulations of each complex, (Supplementary Figure 7) the closed conformation was  
4 found to be unstable in the absence of bound methionine. Over the course of the simulations,  
5 nearly all active site loops across all complexes and replicates transitioned to a dynamic open  
6 conformation. To avoid sampling bias arising from the variability in closed-to-open transition  
7 time points across domains and replicates, we used representative open-state structures at the  
8 endpoint of these trajectories as seed structures for open-state simulations.

9  
10 Triplicate 500 ns simulations of all four systems (Supplementary Figure 8) show no clear  
11 differences in backbone dynamics between eMAT and hMAT2A (Supplementary Figure 9 &  
12 10), suggesting that conformational fluctuations in the protein backbone are not responsible for  
13 nucleotide discrimination in eMAT. During these simulations, changes in substrate positioning  
14 were also observed (Supplementary Figure 11). While the triphosphate moiety in both ATP and  
15 UTP-bound simulations remain stable, the sugar and purine/pyrimidine moieties adopt varied  
16 conformations, as the active site loop open state lacks the stabilizing interaction with Ile102'  
17 observed in the closed-state structures (Figures 3; Supplementary Figure 12). The resulting  
18 substrate conformations are largely dictated by rotations around the  $\beta$  and  $\chi$  dihedral angles  
19 (Figure 4).

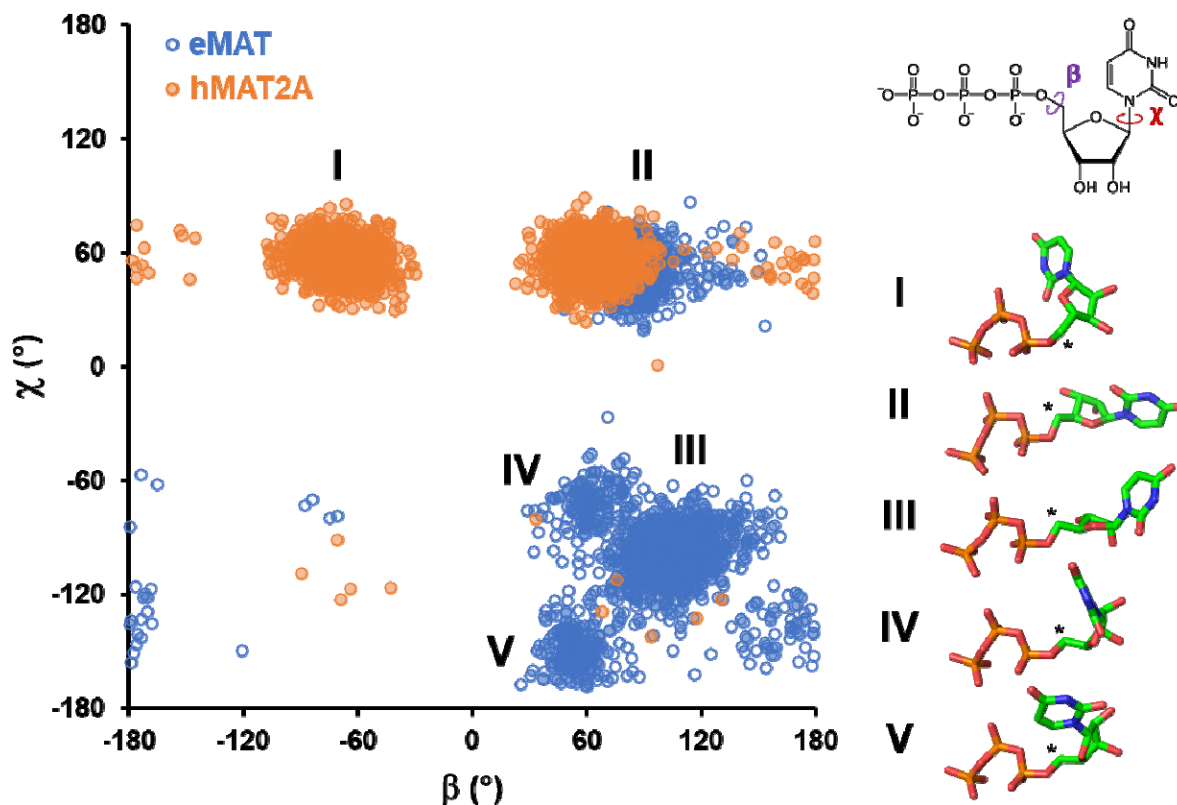

1  
2 **Figure 4. Conformational states populated by the UTP substrate bound to eMAT or hMAT2A.**  
3 A plot of the UTP  $\beta$  vs  $\chi$  dihedral angles (shown on the inset 2D representation of UTP) highlights  
4 the differences in conformational diversity exhibited by UTP in complex with eMAT or hMAT2A. Each  
5 data point represents a dihedral angle pair from one UTP molecule in one simulation frame, sampled  
6 every nanosecond over triplicate 500 ns trajectories. Dihedral angle measurements from different  
7 enzyme subunits were treated as independent data points. Major conformational clusters in the  
8 resulting landscape are shown as a stick representation with the electrophilic C5' identified with an  
9 asterisk. The different conformational states adopted by UTP in eMAT and hMAT2A are indicative of  
10 differing enzyme-substrate interactions that constrain the UTP conformation and may contribute to  
11 enzyme specificity.  
12

13 In hMAT2A, the  $\beta$  dihedral angle varies between gauche<sup>-</sup> (I) and gauche<sup>+</sup> (II) conformations,  
14 while the  $\chi$  dihedral angle is observed to predominantly adopt the favourable gauche<sup>+</sup> (II)  
15 conformation. In eMAT however, interactions between Lys165 and the O4' / O5' of UTP  
16 prevent the adoption of the  $\beta$  dihedral gauche<sup>-</sup> conformation. In several domain replicates of the  
17 eMAT:UTP complex, a strained eclipsed  $\chi$  dihedral conformation (III) is observed that likely  
18 arises from electrostatic repulsion between UTP's uracil moiety and the nearby Asp118 side  
19 chain and Gly117 backbone carbonyl (Supplementary Figure 13). Dissociation of the nucleotide  
20 in eMAT:UTP complex was never observed over the timescale of the simulations performed due  
21 to strongly favourable interactions between bound Mg<sup>2+</sup> ions and the triphosphate moiety<sup>36, 37</sup>.

1 However, the strained nucleotide conformations observed in the eMAT:UTP complex, which are  
2 absent in the hMAT2A:UTP complex, may indicate a weaker binding capacity for UTP in the  
3 open state for eMAT comparatively to hMAT2A. Interestingly, in one instance, this  
4 conformation also transitioned to an alternate conformation that rapidly fluctuated between  
5 gauche<sup>□</sup> (Figure 4 , IV) and trans (Figure 4 , V)  $\chi$  dihedral conformations. The trans (V)  $\chi$   
6 dihedral conformation, which is observed only in the eMAT:UTP complex, positions the UTP  
7 pyrimidine ring such that it blocks binding and nucleophilic attack from methionine on C5' of  
8 UTP (Figure 4). Thus, subtle substrate-enzyme interactions in eMAT that are not present in  
9 hMAT2A result in an altered UTP conformational landscape that destabilizes substrate binding  
10 and forces the adoption of non-productive binding modes. These observations are consistent with  
11 the disorder in the active site loop and the poor electron density for the nucleoside moieties in the  
12 substrates/products from co-crystallization with CTP/UTP/GTP/UppNHp/GppNHp (Figure 3), as  
13 well as the observed substrate specificity of eMAT (Table 1). It is however important to note that  
14 these results show that productive binding of non-cognate NTPs can occur (consistent with slow  
15 turnover), but that they are less stable/frequent in eMAT than in hMAT2A.

16  
17

18 **The promiscuity of hMAT2A is relevant *in vivo*.** Having established that hMAT2A is  
19 promiscuous, and eMAT is specific we compared the reported the physiological concentrations  
20 of these NTPs in human<sup>38</sup> and *E. coli*<sup>39</sup> cells (Supplementary Table 2): in human cells, the  
21 concentration of ATP is ~2.5 mM and the other NTPs (GTP 0.2 mM, CTP 0.08 mM and UTP  
22 0.2 mM) are almost 10-fold lower, whereas in *E. coli* the NTPs are all present at similar  
23 concentrations.

24

25 We then investigated whether the promiscuous products of hMAT2A could be detected *in vivo*.  
26 We performed metabolite analysis of SNM abundance using liquid chromatography-mass  
27 spectrometry (LC-MS) of extracts from the normal human liver cell line THLE-2 and the  
28 hepatocarcinoma cell (HCC) line HepG2, in which hMAT2A is known to be upregulated<sup>40-42</sup>.  
29 Notably, we observed the breakdown product of SGM, methionine thioguanosine (MTG), in the  
30 HepG2 cell line (Figure 5a) and not in a THLE-2 (Supplementary Figure 14). As a control, we  
31 could detect SAM and MTA in both the samples (Appendix). To the best of our knowledge,

1 there is no other way to form MTG other than from SGM (Figure 5b). The presence of MTG was  
2 confirmed by mass spectrometry analysis (Figure 5c). It is unclear whether MTG formed during  
3 the extraction procedure or is generated endogenously in the cells. However, SNM analogs were  
4 found to have comparable stability in aqueous buffer over the same period. (Supplementary  
5 Figure 15), suggesting SGM is not significantly less stable and more prone to degradation. Even  
6 though the  $K_M$  of hMAT2A with CTP (0.08 mM) is lower than for ATP (0.27 mM) we did not  
7 detect SCM or MTC analogs in any of the cell lines within the sensitivity range of the  
8 experiment; most likely due to the lower CTP concentration within the cells (0.083 in normal  
9 cells and 0.4 mM in cancer cells). It is currently unclear what role the hMAT2 $\beta$  subunit has on  
10 specificity, although the work presented here indicates specificity is primarily dictated by the  
11 catalytic subunit.

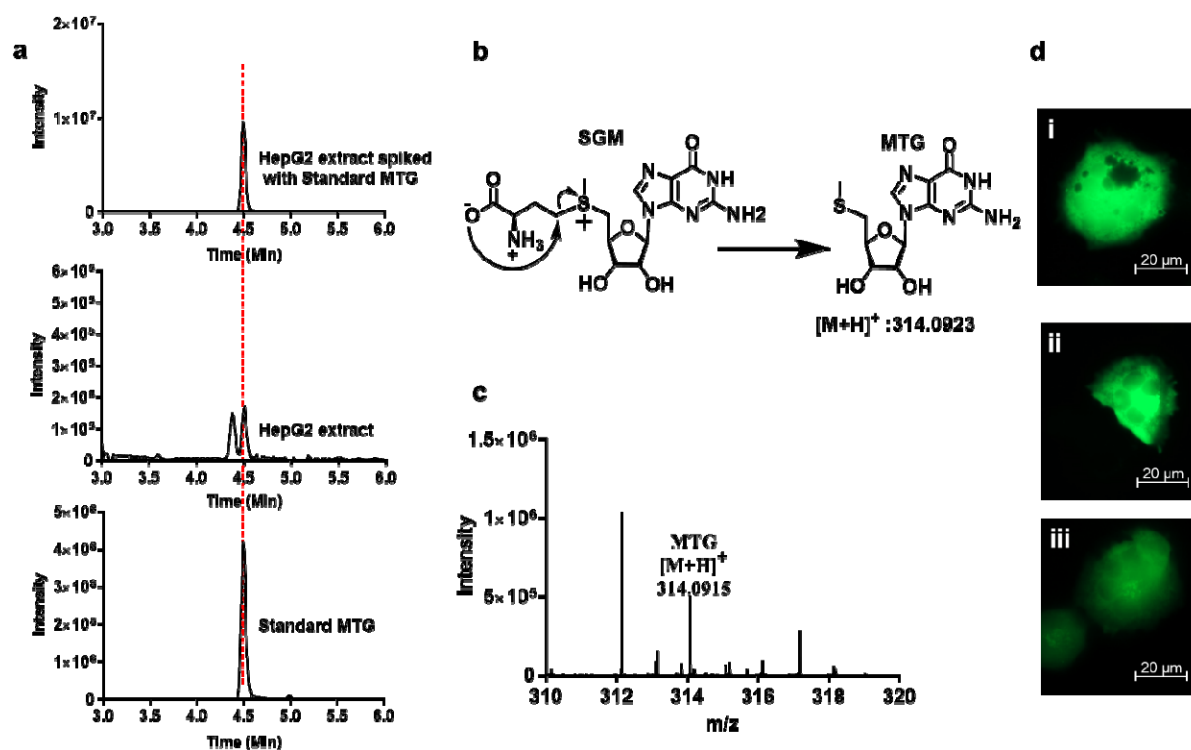

12  
13 **Figure 5. LC-MS analysis of metabolite and effect of SGM, SAM on HepG2.** a) Extracted  
14 chromatograms of the standard MTG, HepG2 cell extract, cell extract samples spiked with the  
15 standard MTG. b) Schematic representation of degradation of SGM in to MTG after attack of  
16 carboxylate on the  $\gamma$  carbon atom of the methionine. c) Mass spectrum of HepG2 extract showing  
17 the mass of MTG  $[M+H]^+$  314.0915. Data was collected using a Q-Exactive HF mass spectrometer  
18 coupled with Waters UPLC ACQUITY M-Class liquid chromatography system. An analytical column  
19 (ACQUITY UPLC HSS T3 1.8  $\mu$ m, 1.0 x 150 mm) was used for sample chromatographic separation.

1 **d)** Fluorescence microscopy images showing no morphological effect of SGM and SAM on HepG2  
2 cells. HepG2 cells electroporated with (i) pmaxGFP plasmid and with (ii) 1 mM SAM, (iii) 1 mM SGM.  
3 Imaging is done using Celldiscover 7 microscope with 20X resolution with 2x magnification changer.  
4 Experiment was performed in biological triplicate.

5  
6 After the inferred identification of SGM in liver cancer cells, we investigated whether SGM  
7 resulted in cellular toxicity or any cellular morphology changes. To overcome the low cell  
8 membrane permeability of SGM,<sup>43, 44</sup> we performed cell electroporation in the presence of three  
9 different concentration of SGM (0.01 mM, 0.1 mM, and 1 mM). Electroporation was carried out  
10 along with a pmaxGFP plasmid to allow fluorescence microscopy observation and possibly  
11 detect any morphological changes. Cells were observed after an overnight incubation. The  
12 number of cells in the sample electroporated with SGM was comparable to the control  
13 (electroporation only with pmaxGFP plasmid) (Supplementary Figure 16a), even at the highest  
14 SGM concentration, which indicates that the concentrations of SGM that were used do not affect  
15 cell survival. No microscopic effects on cell morphology could be detected for HepG2 (Figure  
16 5d; Supplementary Figure 16b and c) nor any change in the cell survival. The same experiment  
17 was performed using different concentration of SAM (0.01 mM, 0.1 mM, and 1 mM), for HepG2  
18 (Figure 5d; Supplementary Figure 16d and e) resulting in the same observations. Since SGM  
19 carries the same methyl transferring group as SAM, it is possible that SGM can neutrally  
20 substitute for SAM in the methylation or polyamine downstream pathways (Supplementary  
21 Figure 17), or that it is simply inert. Overall, we have shown that hMAT2A produces SGM *in*  
22 *vivo*, that SGM (and/or its breakdown product MTG) is present in the cancer cell line HepG2 in  
23 which hMAT2A is upregulated, suggesting that it could be potentially used as a biomarker, and  
24 that SGM is not toxic for human cells within the parameters of this experiment.

25

## 26 **Discussion**

27 The enzyme kinetics and structural analysis suggests that the catalytic specificity of eMAT is a  
28 result of the non-cognate substrates failing to adopt stable and catalytically competent binding  
29 modes. This leads to two questions: first, why are the unique substrate binding modes observed  
30 in the eMAT:UTP simulations not catalytically competent? The sulfur of methionine performs its  
31 nucleophilic substitution at the ribose C5' atom; thus, the accessibility of this atom is of



1 paramount importance. In the non-productive states sampled by UTP throughout the simulation,  
2 the position of the C5' atom is sterically occluded by the pyrimidine ring and methionine attack  
3 is sterically blocked (Figure 4). Clearly, UTP is a viable substrate for eMAT; indeed, we observe  
4 in the MD simulations that catalytically productive enzyme:substrate complexes are stable for  
5 hundreds of nanoseconds. Thus, the disorder observed here is best conceptualized as a partial  
6 depletion of catalytically productive substrate binding and weaker binding stability, compared  
7 with the cognate substrate, ATP. Second, what are the contributions of structural dynamics to  
8 hMAT2A catalysis with non-cognate substrates in comparison to eMAT? The active sites are  
9 essentially identical (20/21 residues) and substitutions of Ser/Thr in either enzyme at the one  
10 variant position have no effect on specificity. However, there are many sequence differences  
11 between eMAT and hMAT2A in the second and third shells of the active site loop  
12 (Supplementary Figure 18). A plausible explanation is therefore that the crystallographic closed  
13 state of hMAT2A observed in the presence of non-cognate substrates is promoted by additional  
14 stabilizing interactions in the second and third shells of the active site loop, even though non-  
15 cognate substrates make fewer stabilizing interactions with first shell residues. In contrast,  
16 eMAT cannot as easily sustain the closed active site loop conformation without the additional  
17 stabilizing interactions from the adenine group, which are not present in the binding modes of the  
18 other non-cognate nucleotides.

19  
20 The selective pressure that drove the divergence in catalytic specificity between these  
21 orthologous enzymes most likely relates to the different cellular abundance of these molecules,  
22 i.e., there has been little selective pressure for hMAT2A to be specific because the other NTPs  
23 are not present at sufficiently high concentrations to compete with ATP. Indeed, the  
24 concentration of ATP is ~10-fold higher than the  $K_M$ , whereas for GTP/CTP/UTP the  
25 physiological concentrations are at or below the respective  $K_M$  values (Table 1). In contrast, the  
26 concentrations of these NTPs in *E. coli* are more similar: ATP is 3.5 mM while GTP is 1.6 mM.  
27 Thus, eMAT likely evolved specificity owing to the selective pressure to discriminate between  
28 ATP and other nucleotides: the  $K_M$  of eMAT for ATP is at least 16-fold lower than for any of the  
29 non-cognate NTPs (Table 1).

30

1 Finally, in this work we showed how MAT promiscuity is relevant *in vivo* as putative example of  
2 “underground metabolism”<sup>10</sup>. It is thought that promiscuous functions of enzymes are likely to  
3 be physiologically irrelevant<sup>1</sup>. For instance, many promiscuous activities cannot occur at  
4 sufficiently high frequency to be relevant owing to the substrate concentrations encountered in  
5 physiological contexts<sup>45</sup>, or the extremely low catalytic efficiency of many promiscuous  
6 activities making it irrelevant on biological timescales<sup>46-48</sup>. This study is therefore a rare example  
7 where we could detect the promiscuous activity of hMAT2A for GTP *in vivo*. Moreover, we  
8 showed that it could be used as a biomarker to distinguish between normal and cancer cell lines.

9  
10 In summary, these results show how enzyme dynamics have substantial effects on the  
11 conformational sampling of substrates within the active site of an enzyme, which can in turn  
12 result in large changes in catalytic specificity. The concept of non-productive substrate binding is  
13 not new<sup>49</sup>, nor is the notion that protein dynamics can affect substrate turnover<sup>50, 51</sup>, but this is an  
14 interesting example where the link between these two effects can be clearly seen. Moreover,  
15 because we have compared orthologous enzymes that have been on different evolutionary  
16 trajectories because of their distinct cellular environments, we have been able to show that the  
17 sequence differences controlling this specificity originate in the outer shells of the active site,  
18 which builds on a growing body of work that supports a model in which these outer-shell  
19 residues are critical for maintaining the optimum active site architecture and controlling  
20 conformational changes that are important in the catalytic cycle<sup>15</sup>. Consideration of these effects  
21 should aid enzyme engineers, evolutionists and synthetic chemists in the design and study of  
22 enzymes, substrates, and inhibitors. For example, we hope that this work will aid in the design of  
23 SAM analogues with unnatural bases; such analogues could show promise for reaching cellular  
24 bio-orthogonal probes or inhibitors of methyltransferases.

## 25 26 **Methods**

27 **Protein expression and purification.** The eMAT plasmid was a generous gift from Prof.  
28 Ronald E. Viola. *E. coli* BL21 (DE3) cells were transformed with the eMAT plasmid and protein  
29 was expressed as reported previously<sup>19</sup>. Cell pellets were resuspended in lysis Buffer (40 mM  
30 Tris-HCl pH 8.0, 300 mM NaCl, 10 mM imidazole) supplemented with 0.5 units turbonuclease  
31 (T4330, Sigma Aldrich), 0.3 mg.ml<sup>-1</sup> lysozyme, 0.2 mM PMSF and 5 mM DTT. Solubilised

1 pellets were lysed by sonication and centrifuged at  $30,000 \times g$  for 30 min. The soluble fraction  
2 was applied to a 5 mL HisTrap HP Ni<sup>2+</sup>-NTA IMAC column (GE Healthcare) pre-equilibrated  
3 with lysis buffer and washed with 50 mM imidazole. eMAT was eluted in lysis buffer  
4 supplemented with 400 mM imidazole and concentrated with an Amicon Ultra-15 spin  
5 concentrator (30 kDa MW cut-off, Millipore). eMAT was further purified by size exclusion  
6 chromatography (SEC) using a HiLoad® 26/600 Superdex 200 pg column (GE Healthcare) in  
7 SEC Buffer A (50 mM Tris-HCl pH 8.0, 100 mM NaCl and 5 mM DTT). Analysis of MAT  
8 protein purity was verified with Coomassie SDS polyacrylamide gel electrophoresis and protein  
9 concentrations were calculated using the molar extinction coefficient predicted by the ExPASy  
10 ProtParam server tool at A<sub>280</sub>. The hMAT2A plasmid was gift from the Jon S. Thorson and  
11 purified as reported<sup>52</sup>. hMAT2A pellets were processed in the same manner as eMAT, using  
12 sonication and Ni<sup>2+</sup>-NTA IMAC except for the composition of lysis buffer (50 mM Na<sub>2</sub>HPO<sub>4</sub> pH  
13 8.0, 300 mM NaCl and 10 mM imidazole). hMAT2A elution was then incubated with 10 mM L-  
14 methionine, 10 mM MgCl<sub>2</sub> and 100 μM UppNHp for 1h on ice before purification in SEC Buffer  
15 B (25 mM HEPES pH 7.6, 150 mM NaCl, 5 mM KCl, 5 mM DTT and 10% (v/v) glycerol) for  
16 crystallization.

17  
18 **Protein crystallization, data collection and structure determination.** eMAT crystals were  
19 grown at 19 °C using the hanging-drop vapour diffusion method with reservoir solutions  
20 containing 0.1 M BIS-TRIS pH 6.5 and 10-20% (v/v) ethylene glycol while screening two  
21 different lengths of polyethylene glycol (PEG) at varying concentrations: PEG 8000 from 6-9 %  
22 (w/v) and PEG 3350 from 16-22 % (w/v). Drops were setup at 1:1 ratio and 1:2 ratio of reservoir  
23 to protein volume. Co-crystals formed within 2-4 days at 19 °C with various substrates.  
24 hMAT2A-UppNHp was concentrated to 10 mg.ml<sup>-1</sup> for protein X-ray crystallographic studies.  
25 hMAT2A-UppNHp hanging drops were grown at 19 °C at a 1:1 and 1:2 ratio of reservoir to  
26 protein volume. The optimised screening matrix consist of 0.1 M BIS-TRIS pH 6.5 and 10%  
27 (v/v) ethylene glycol while screening PEG 3350 at concentrations of 7-10% (w/v). Cubic  
28 diamond crystals formed within 2 days at 19 °C. The co-crystals were cryoprotected in solutions  
29 containing the mother liquor and increasing the concentrations of PEG 8000 or PEG 3350 to 25-  
30 35% (w/v) before being flash-frozen in liquid nitrogen. Diffraction data was collected on the  
31 macromolecular crystallography beamline (MX2) at the Australian Synchrotron using the Eiger

1 X 6M detector at a wavelength of 0.9537 Å<sup>53</sup>. Data was processed using XDS<sup>54</sup> and Aimless<sup>55</sup>,  
2 and molecular replacement was performed using Phaser<sup>56</sup>. Iterative cycles of manual model  
3 building and refinement were performed using Coot 0.9.3<sup>57</sup> and phenix.refine<sup>58</sup>. Iterative cycles  
4 of manual model building and refinement were performed using Coot 0.9.3<sup>57</sup>, and  
5 phenix.refine<sup>58</sup>. TLS refinement was used in all cases, using TLS groups automatically selected  
6 by phenix.refine. Notably, chain B in the hexagonal space groups exhibited significant disorder  
7 in places. All crystallization conditions, data collection and refinement details are provided in  
8 Supplementary Table 1.

9

### 10 **Molecular dynamics simulations**

11 All molecular dynamics simulations were carried out using GROMACS 2018.3<sup>59</sup>. Closed-state  
12 simulations were run using nucleotide-bound models derived from hMAT2A:SAM,  
13 hMAT2A:SUM, and eMAT:SAM crystal structure as starting points. For eMAT:UTP  
14 simulations, UTP was modelled in the eMAT:ATP model structure at the ATP position. Open-  
15 state simulations were run using the final frame from a randomly selected closed-state simulation  
16 replicate in which all domains had transitioned to the open state as starting points. Completed  
17 structures were solvated in a dodecahedral simulation box with a minimum distance of 10 Å  
18 from any protein atom to the box wall, followed by addition of roughly 50 mM NaCl into the  
19 aqueous phase, neutralizing the system charge. All systems were subjected to steepest-descent  
20 energy minimisation followed by a 100 ps equilibration in the NVT ensemble with position  
21 restraints of 1000 kJ/mol/nm<sup>2</sup> on all protein atoms, with velocities initialising from a Maxwell  
22 distribution at 300 K. All NVT equilibrated systems were then subjected to 100 ps equilibration  
23 in the NPT ensemble with position restraints of 1000 kJ/mol/nm<sup>2</sup> on all protein atoms. Position  
24 restraints were released, and free simulation performed at 300 K for 1 μs for each replicate. All  
25 simulations were performed using the CHARMM36-feb2021 forcefield<sup>60</sup>. Water was explicitly  
26 modelled using the TIP3P model. Ionisable residues were set to their standard protonation state  
27 at pH 7. All equilibration and production simulations were conducted under periodic boundary  
28 conditions. Temperature was maintained close to the reference value of 300 K using V-rescale  
29 temperature coupling. Pressure was maintained close to the reference value of 1 atm using a  
30 Parinello-Rahman barostat with isotropic pressure coupling. The LINCS algorithm<sup>61</sup> was used to  
31 constrain the lengths of all bonds to hydrogen. The Verlet cut-off scheme was used to evaluate

1 the non-bonded interaction pair lists. Van der Waals interactions were evaluated using a simple  
2 cut off scheme with a radius of 12 Å. Coulomb interactions were evaluated using the Particle  
3 Mesh Ewald (PME) method with a grid spacing of 1.6 Å. A 2-fs time-step was used for  
4 integrating the equations of motion. GROMACS tools<sup>59</sup> were used for correction of periodic  
5 boundary conditions. Visual Molecular Dynamics (VMD)<sup>62</sup> was used to view trajectories and for  
6 RMSD, RMSF, and dihedral angle calculations, and PyMOL (The PyMOL Molecular Graphics  
7 System, Version 2.0 Schrödinger, LLC.) was used to produce figures.

8

### 9 **Mutagenesis**

10 Site directed mutagenesis for Ser247Thr mutation on hMAT2A plasmid and Thr227Ser mutation  
11 on eMAT plasmid was carried out using Q5 Site-Directed Mutagenesis Kit (NEB) by following  
12 kit protocol and expressed, purified as hMAT2A and eMAT, respectively. The primers used for  
13 mutagenesis listed in Supplementary table 3.

14

### 15 **Kinetics Assay for MATs**

16 To observe the reaction efficiency of SNM product formation during catalysis with different  
17 substrates ATP/GTP/CTP/UTP (5 mM) and methionine (10 mM), HEPES (100 mM), MgCl<sub>2</sub> (10  
18 mM), KCl (50 mM) and hMAT2A/eMAT/Ser247Thr hMAT2A/Thr227Ser eMAT (20 μM) were  
19 mixed in water, pH was adjusted to 8 with 10% NaOH. The reactions were incubated at 37 °C  
20 for 1 hr. Reaction was quench by acetonitrile followed by centrifugation at 12,000 RPM for 5  
21 min to precipitate the enzymes. Finally, supernatant was filtered through 0.22 μm filter (Merck)  
22 and injected in UPLC for analysis (Waters UPLC Acquity H class). Diluted reaction aliquots  
23 were analyzed by using a HILIC column (SeQuant ZIC-cHILIC 3 μm, 100 Å 150 x 2.1 mm  
24 PEEK coated HPLC column). An isocratic method was used with solvent A (100 mM  
25 ammonium acetate, pH 5.3) 35% and solvent B (acetonitrile) 65% for 15 min. Each injection was  
26 3 μL with a flow rate of 0.3 mL/min and detected at 260 nm. Using this UPLC method retention  
27 times for molecules were MTA 1.3 min, MTU 1.3 min, MTC 1.4 min, MTG 1.5 min, adenine 1.6  
28 min, uracil 1.6 min, cytosine 1.8 min, guanine 2 min, SAM 4.1 min, SCM 4.6 min, SUM 4.6  
29 min, SGM 5.3 min, ADP 5.3 min, UDP 6 min, CDP 6.1 min, GDP 6.3 min, ATP 7.5 min, GTP  
30 7.8 min, CTP 8.3 min. Product formation was further confirmed by mass analysis (Appendix).  
31 SNM were purified using above mentioned UPLC method and standard curves were plotted. For

1 kinetic assay concentrations of the NTPs were in the range of 0.0251-5 mM and constant  
2 methionine concentration 10 mM were used. The kinetic parameters were determined using the  
3 Michaelis-Menten equation using GraphPad Prism 7.02. The release of nucleotide bases from  
4 SNM analogs were also detected by UPLC (Supplementary Figure 5a). SAM is prone to alkaline  
5 depurination<sup>63</sup> but release of nucleotide bases for pyrimidine ring in our reaction conditions  
6 might be due to deprotonation at C-5' in basic conditions followed by the opening of the ribose  
7 ring which eliminates nucleotide base, further attack of water reforms ribose ring to give S-  
8 ribosylmethionine<sup>64</sup>. Elimination of nucleotide bases was not observed from NTPs  
9 (Supplementary Figure 2b) under the same conditions, which demonstrate that release of  
10 nucleotide base was from SNM analogs.

### 11 12 **Analytical Size Exclusion chromatography**

13 Size exclusion chromatography was performed using GE Healthcare Life Sciences using  
14 Superdex 200 Increase 10/300 GL column. Injection volume was 100  $\mu$ L, detection at 280 nm  
15 and flow rate was 0.5 mL/min. Nonhydrolyzable NTPs (1 mM) Adenosine-5'-[( $\beta$ , $\gamma$ )-  
16 imido]triphosphate (AppNHp), Guanosine-5'-[( $\beta$ ,  $\gamma$ )-imido]triphosphate (GppNHp), Cytidine-  
17 5'-[( $\beta$ ,  $\gamma$ )-methylene] triphosphate (CppCp), Uridine-5'-[( $\beta$ ,  $\gamma$ )-imido]triphosphate (UppNHp)]  
18 were incubated with methionine (L-Met) (10 mM) in HEPES (100 mM), KCl (50 mM), MgCl<sub>2</sub>  
19 (10 mM), pH 8 at 37  $\square$ C for 1 hr and then injected in the column.

### 20 21 **Cell culture and extraction of metabolites**

22 HepG2 was grown in DMEM medium containing 10% FBS and penicillin (100 U/ml),  
23 streptomycin (100 mg/ml) by incubation in a 5% CO<sub>2</sub> at 37  $\square$  C with 95% humidity. For routine  
24 maintenance, cells were trypsinized and split before becoming fully confluent. Cultured cells  
25 were washed with cold PBS (5 mL) twice. Cells (20 M) were harvested by trypsinization using  
26 TrypLE Express Enzyme (1X), no phenol red for 3 min at 37  $\square$  C in CO<sub>2</sub> incubator. Centrifuged  
27 for 5 min at 100g. TrypLE was discarded, and pellet was resuspended into cold PBS. Cell pellet  
28 was washed with cold PBS twice. Further extraction steps were performed on ice. Internal  
29 standards (10 nmol of HEPES and PIPES) were added to sample. Cells were disrupted using 1  
30 mL of cold acetonitrile, methanol, water (40:40:20) with 0.1 M formic acid and glass beads acid  
31 washed, by vortexing. Metabolites were collected by the centrifugation. Samples were

1 concentrated using speed vac and finally dissolved in 100  $\mu$ L of 10% acetonitrile with 0.1%  
2 formic acid and filtered through a 0.22  $\mu$ m filter and injected into LC-MS.

3

#### 4 **LC-MS method for metabolite analysis**

5 Data were collected using Q-Exactive HF mass spectrometer (Thermo Fisher Scientific) coupled  
6 with Waters UPLC ACQUITY M-Class liquid chromatography system. An analytical column  
7 (ACQUITY UPLC HSS T3 1.8  $\mu$ m, 1.0 x 150 mm) was used for sample chromatographic  
8 separation. An injection volume of 2  $\mu$ L was separated at flow rate of 50  $\mu$ L/min using a  
9 gradient of 10–95% solvent B over 8 min, using water with 0.1% formic acid as solvent A and  
10 acetonitrile with 0.1% formic acid as solvent B. MS data were collected using Q-Exactive HF  
11 mass spectrometer (Thermo Fisher Scientific). The parameters are listed here: spray voltage, 3.0  
12 kV; sheath gas, 16; auxiliary gas, 2; capillary temperature, 250  $^{\circ}$ C; aux gas heater temp, 150  $^{\circ}$ C;  
13 S-lens RF, 50; tuning method name, HESI; Spray interface, HESI, with metal needle for small  
14 flow (1 to 10  $\mu$ L/min). The mass spectrometry method was set to acquire MS1 data for 14 min,  
15 positive mode, mass range 80 to 1,000 m/z. Resolution was set at 60,000. Maximum injection  
16 time was 30 ms. Auto gain was targeted to 500000 ions. Extracted ion chromatograms were done  
17 using a 5-ppm tolerance and smoothing with Boxcar method using 7 points.

18

#### 19 **Cell electroporation with SGM, SAM and pmaxGFP Plasmid**

20 Cells were harvested by trypsinization and  $2 \times 10^6$  cells were pelleted by centrifugation at 100g for  
21 3 min. Cells were resuspended in Nucleofector solution from Lonza. SF cell line 4d-  
22 Nucleofector X kit S (V4XC-2032) for HepG2 cells. Cells were electroporated with 0.4  $\mu$ g  
23 pmaxGFP plasmid and different concentrations of SGM and SAM (0.01, 0.1, 1 mM) using 4D-  
24 Nucleofector X Unit from Lonza. EH-100 program was used for HepG2 by following the  
25 manufactures protocol. Cells were incubated overnight in the incubator and observed under the  
26 fluorescence microscope. Cells were observed using Leica DMiL microscope using 10X  
27 objective. For higher magnification cells were observed using ZEISS Celldiscoverer 7 using 20X  
28 objective with 2 $\times$  magnification changer.

29

#### 30 **Author contributions**

1 M.G. performed MAT kinetics assay (including protein purification), ran SEC analysis,  
2 performed all the cell experiments (including culturing), metabolites extractions, imaging,  
3 processed and analyzed data. M.G., A.V.B ran LC-MS for metabolites, processed and analyzed  
4 data. L.L.T. expressed and purified protein for crystallography and collected crystallographic  
5 data. L.L.T., A.D., J.S.B. C.J.J. processed, solved, and analyzed crystallographic data. A.D. and  
6 M.S. performed molecular dynamics simulations. P.L. and C. J. J. analyzed data and wrote the  
7 paper with input from M.G and A. D. P. L., and C.J.J. conceived and supervised the project.

8

## 9 **Acknowledgments**

10 We thank Yohsuke Moriyama for assistance with the cell electroporation experiment and Keiko  
11 Kono to share the fluorescent microscope in her Unit. We thank Saacnicteh Toledo-Patino and  
12 Benjamin Clifton for insightful comments on this manuscript.

13

## 14 **Funding**

15 Financial support by the Okinawa Institute of Science and Technology to P.L. is gratefully  
16 acknowledged. Laurino lab is supported by Kakenhi Grant (# 90812256). This project was  
17 supported by OIST Kick start up grant. Funding by the Australian Research Council for the  
18 Centres of Excellence in Synthetic Biology and Innovation in Peptide and Protein Science is  
19 gratefully acknowledged. This research was undertaken in part using the MX2 beamline at the  
20 Australian Synchrotron, part of ANSTO, and made use of the Australian Cancer Research  
21 Foundation (ACRF) detector.

22

23

24

## 25 **References**

- 26 1. Copley, S.D. Shining a light on enzyme promiscuity. *Curr Opin Struct Biol* **47**, 167-175 (2017).  
27 2. O'Brien, P.J. & Herschlag, D. Catalytic promiscuity and the evolution of new enzymatic  
28 activities. *Chem Biol* **6**, R91-R105 (1999).  
29 3. Jensen, R.A. Enzyme recruitment in evolution of new function. *Annu Rev Microbiol* **30**, 409-425  
30 (1976).  
31 4. Khersonsky, O., Roodveldt, C. & Tawfik, D.S. Enzyme promiscuity: evolutionary and  
32 mechanistic aspects. *Curr Opin Chem Biol* **10**, 498-508 (2006).  
33 5. Copley, S.D. Enzymes with extra talents: moonlighting functions and catalytic promiscuity. *Curr*  
34 *Opin Chem Biol* **7**, 265-272 (2003).



- 1 6. Jeffery, C.J. Moonlighting proteins. *Trends Biochem Sci* **24**, 8-11 (1999).
- 2 7. Khersonsky, O. & Tawfik, D.S. Enzyme promiscuity: a mechanistic and evolutionary  
3 perspective. *Annu Rev Biochem* **79**, 471-505 (2010).
- 4 8. Piedrafita, G., Keller, M.A. & Ralser, M. The Impact of Non-Enzymatic Reactions and Enzyme  
5 Promiscuity on Cellular Metabolism during (Oxidative) Stress Conditions. *Biomolecules* **5**, 2101-  
6 2122 (2015).
- 7 9. Ward, P.S. *et al.* The common feature of leukemia-associated IDH1 and IDH2 mutations is a  
8 neomorphic enzyme activity converting alpha-ketoglutarate to 2-hydroxyglutarate. *Cancer Cell*  
9 **17**, 225-234 (2010).
- 10 10. D'Ari, R. & Casadesus, J. Underground metabolism. *Bioessays* **20**, 181-186 (1998).
- 11 11. Gora, A., Brezovsky, J. & Damborsky, J. Gates of enzymes. *Chem Rev* **113**, 5871-5923 (2013).
- 12 12. Tokuriki, N. & Tawfik, D.S. Protein dynamism and evolvability. *Science* **324**, 203-207 (2009).
- 13 13. Maria-Solano, M.A., Serrano-Hervas, E., Romero-Rivera, A., Iglesias-Fernandez, J. & Osuna, S.  
14 Role of conformational dynamics in the evolution of novel enzyme function. *Chem Commun*  
15 (*Camb*) **54**, 6622-6634 (2018).
- 16 14. Clifton, B.E. & Jackson, C.J. Ancestral Protein Reconstruction Yields Insights into Adaptive  
17 Evolution of Binding Specificity in Solute-Binding Proteins. *Cell Chem Biol* **23**, 236-245 (2016).
- 18 15. Campbell, E. *et al.* The role of protein dynamics in the evolution of new enzyme function. *Nat*  
19 *Chem Biol* **12**, 944-950 (2016).
- 20 16. Barrozo, A., Duarte, F., Bauer, P., Carvalho, A.T. & Kamerlin, S.C. Cooperative Electrostatic  
21 Interactions Drive Functional Evolution in the Alkaline Phosphatase Superfamily. *J Am Chem*  
22 *Soc* **137**, 9061-9076 (2015).
- 23 17. Jones, B.J. *et al.* Larger active site in an ancestral hydroxynitrile lyase increases catalytically  
24 promiscuous esterase activity. *PLoS One* **15**, e0235341 (2020).
- 25 18. Miton, C.M. *et al.* Evolutionary repurposing of a sulfatase: A new Michaelis complex leads to  
26 efficient transition state charge offset. *Proc Natl Acad Sci U S A* **115**, E7293-E7302 (2018).
- 27 19. Parungao, G.G. *et al.* Complementation of a metK-deficient E. coli strain with heterologous  
28 AdoMet synthetase genes. *Microbiology* **163**, 1812-1821 (2017).
- 29 20. Markham, G.D. & Pajares, M.A. Structure-function relationships in methionine  
30 adenosyltransferases. *Cell Mol Life Sci* **66**, 636-648 (2009).
- 31 21. Merali, S. & Clarkson, A.B., Jr. S-adenosylmethionine and Pneumocystis. *FEMS Microbiol Lett*  
32 **237**, 179-186 (2004).
- 33 22. Lu, S.C. & Mato, J.M. S-adenosylmethionine in liver health, injury, and cancer. *Physiol Rev* **92**,  
34 1515-1542 (2012).
- 35 23. Zhao, M., Wijayasinghe, Y.S., Bhansali, P., Viola, R.E. & Blumenthal, R.M. A surprising range  
36 of modified-methionyl S-adenosylmethionine analogues support bacterial growth. *Microbiology*  
37 **161**, 674-682 (2015).
- 38 24. Cantoni, G.L. The Nature of the Active Methyl Donor Formed Enzymatically from L-Methionine  
39 and Adenosinetriphosphate. *J Am Chem Soc* **74**, 2942-2943 (1952).
- 40 25. Mudd, S.H. & Cantoni, G.L. Activation of methionine for transmethylation. III. The methionine-  
41 activating enzyme of Bakers' yeast. *J Biol Chem* **231**, 481-492 (1958).
- 42 26. McQueney, M.S., Anderson, K.S. & Markham, G.D. Energetics of S-adenosylmethionine  
43 synthetase catalysis. *Biochemistry* **39**, 4443-4454 (2000).
- 44 27. Lu, Z.J. & Markham, G.D. Enzymatic properties of S-adenosylmethionine synthetase from the  
45 archaeon *Methanococcus jannaschii*. *J Biol Chem* **277**, 16624-16631 (2002).
- 46 28. Komoto, J., Yamada, T., Takata, Y., Markham, G.D. & Takusagawa, F. Crystal structure of the  
47 S-adenosylmethionine synthetase ternary complex: A novel catalytic mechanism of S-  
48 adenosylmethionine synthesis from ATP and Met. *Biochemistry* **43**, 1821-1831 (2004).
- 49 29. Markham, G.D., Parkin, D.W., Mentch, F. & Schramm, V.L. A Kinetic Isotope Effect Study and  
50 Transition-State Analysis of the S-Adenosylmethionine Synthetase Reaction. *Journal of*  
51 *Biological Chemistry* **262**, 5609-5615 (1987).

- 1 30. Parry, R.J. & Minta, A. Studies of enzyme stereochemistry. Elucidation of the stereochemistry of  
2 S-adenosylmethionine formation by yeast methionine adenosyltransferase. *J Am Chem Soc* **104**,  
3 871-872 (1982).
- 4 31. Takusagawa, F., Kamitori, S., Misaki, S. & Markham, G.D. Crystal structure of S-  
5 adenosylmethionine synthetase. *Journal of Biological Chemistry* **271**, 136-147 (1996).
- 6 32. Murray, B. *et al.* Crystallography captures catalytic steps in human methionine  
7 adenosyltransferase enzymes. *Proc Natl Acad Sci U S A* **113**, 2104-2109 (2016).
- 8 33. Markham, G.D., Hafner, E.W., Tabor, C.W. & Tabor, H. S-Adenosylmethionine synthetase from  
9 *Escherichia coli*. *J Biol Chem* **255**, 9082-9092 (1980).
- 10 34. Kotb, M. & Kredich, N.M. S-Adenosylmethionine synthetase from human lymphocytes.  
11 Purification and characterization. *J Biol Chem* **260**, 3923-3930 (1985).
- 12 35. Halim, A.B., LeGros, L., Geller, A. & Kotb, M. Expression and functional interaction of the  
13 catalytic and regulatory subunits of human methionine adenosyltransferase in mammalian cells. *J*  
14 *Biol Chem* **274**, 29720-29725 (1999).
- 15 36. Wilson, J.E. & Chin, A. Chelation of divalent cations by ATP, studied by titration calorimetry.  
16 *Anal Biochem* **193**, 16-19 (1991).
- 17 37. Zea, C.J., Camci-Unal, G. & Pohl, N.L. Thermodynamics of binding of divalent magnesium and  
18 manganese to uridine phosphates: implications for diabetes-related hypomagnesaemia and  
19 carbohydrate biocatalysis. *Chem Cent J* **2**, 15 (2008).
- 20 38. Traut, T.W. Physiological concentrations of purines and pyrimidines. *Mol Cell Biochem* **140**, 1-  
21 22 (1994).
- 22 39. Buckstein, M.H., He, J. & Rubin, H. Characterization of nucleotide pools as a function of  
23 physiological state in *Escherichia coli*. *J Bacteriol* **190**, 718-726 (2008).
- 24 40. Cai, J., Mao, Z., Hwang, J.J. & Lu, S.C. Differential expression of methionine  
25 adenosyltransferase genes influences the rate of growth of human hepatocellular carcinoma cells.  
26 *Cancer Res* **58**, 1444-1450 (1998).
- 27 41. Chang, C.F., Liau, M.C. & Becker, F.F. Alteration of S-Adenosylmethionine Synthetases during  
28 Chemical Hepatocarcinogenesis and in Resulting Carcinomas. *P Am Assoc Canc Res* **20**, 13-13  
29 (1979).
- 30 42. Paneda, C. *et al.* Liver cell proliferation requires methionine adenosyltransferase 2A mRNA up-  
31 regulation. *Hepatology* **35**, 1381-1391 (2002).
- 32 43. Wang, R., Zheng, W. & Luo, M. A sensitive mass spectrum assay to characterize engineered  
33 methionine adenosyltransferases with S-alkyl methionine analogues as substrates. *Anal Biochem*  
34 **450**, 11-19 (2014).
- 35 44. Lin, Q., Jiang, F., Schultz, P.G. & Gray, N.S. Design of allele-specific protein methyltransferase  
36 inhibitors. *J Am Chem Soc* **123**, 11608-11613 (2001).
- 37 45. Bar-Even, A., Milo, R., Noor, E. & Tawfik, D.S. The Moderately Efficient Enzyme: Futile  
38 Encounters and Enzyme Floppiness. *Biochemistry* **54**, 4969-4977 (2015).
- 39 46. Copley, S.D. An evolutionary biochemist's perspective on promiscuity. *Trends Biochem Sci* **40**,  
40 72-78 (2015).
- 41 47. McLoughlin, S.Y. & Copley, S.D. A compromise required by gene sharing enables survival:  
42 Implications for evolution of new enzyme activities. *Proc Natl Acad Sci U S A* **105**, 13497-13502  
43 (2008).
- 44 48. Khanal, A., Yu McLoughlin, S., Kershner, J.P. & Copley, S.D. Differential effects of a mutation  
45 on the normal and promiscuous activities of orthologs: implications for natural and directed  
46 evolution. *Mol Biol Evol* **32**, 100-108 (2015).
- 47 49. Natarajan, S.K. & Sierks, M.R. Minimizing nonproductive substrate binding: a new look at  
48 glucoamylase subsite affinities. *Biochemistry* **36**, 14946-14955 (1997).
- 49 50. Agarwal, P.K. Role of protein dynamics in reaction rate enhancement by enzymes. *J Am Chem*  
50 *Soc* **127**, 15248-15256 (2005).

- 1 51. Tousignant, A. & Pelletier, J.N. Protein motions promote catalysis. *Chem Biol* **11**, 1037-1042  
2 (2004).
- 3 52. Singh, S. *et al.* Facile chemoenzymatic strategies for the synthesis and utilization of S-adenosyl-  
4 (L)-methionine analogues. *Angew Chem Int Ed Engl* **53**, 3965-3969 (2014).
- 5 53. McPhillips, T.M. *et al.* Blu-Ice and the Distributed Control System: software for data acquisition  
6 and instrument control at macromolecular crystallography beamlines. *J Synchrotron Radiat* **9**,  
7 401-406 (2002).
- 8 54. Kabsch, W. Xds. *Acta Crystallogr D Biol Crystallogr* **66**, 125-132 (2010).
- 9 55. Evans, P.R. & Murshudov, G.N. How good are my data and what is the resolution? *Acta*  
10 *Crystallogr D Biol Crystallogr* **69**, 1204-1214 (2013).
- 11 56. McCoy, A.J. *et al.* Phaser crystallographic software. *J Appl Crystallogr* **40**, 658-674 (2007).
- 12 57. Emsley, P., Lohkamp, B., Scott, W.G. & Cowtan, K. Features and development of Coot. *Acta*  
13 *Crystallogr D Biol Crystallogr* **66**, 486-501 (2010).
- 14 58. Afonine, P.V. *et al.* Towards automated crystallographic structure refinement with phenix.refine.  
15 *Acta Crystallogr D Biol Crystallogr* **68**, 352-367 (2012).
- 16 59. Abraham, M.J. *et al.* GROMACS: High performance molecular simulations through multi-level  
17 parallelism from laptops to supercomputers. *SoftwareX* **1-2**, 19-25 (2015).
- 18 60. Huang, J. *et al.* CHARMM36m: an improved force field for folded and intrinsically disordered  
19 proteins. *Nat Methods* **14**, 71-73 (2017).
- 20 61. Hess, B., Bekker, H., Berendsen, H.J.C. & Fraaije, J.G.E.M. LINCS: A linear constraint solver  
21 for molecular simulations. *J Comput Chem* **18**, 1463-1472 (1997).
- 22 62. Humphrey, W., Dalke, A. & Schulten, K. VMD: visual molecular dynamics. *J Mol Graph* **14**, 33-  
23 38, 27-38 (1996).
- 24 63. Parks, L.W. & Schlenk, F. The stability and hydrolysis of S-adenosylmethionine; isolation of S-  
25 ribosylmethionine. *J Biol Chem* **230**, 295-305 (1958).
- 26 64. Iwig, D.F. & Booker, S.J. Insight into the polar reactivity of the onium chalcogen analogues of S-  
27 adenosyl-L-methionine. *Biochemistry* **43**, 13496-13509 (2004).

28
